# Supplementary material for: An unprecedented pyridine-based dinuclear mixed-valent ReI/VII oxo-bridged complex: a solvatochromic and AIE-active probe for nanomolar detection of picric acid and trinitrotoluene
Source: Royal Society of Chemistry journal article supplement (doi:10.1039/d1dt01002f), 2021-01-01
Supplement: d1dt01002f1.pdf [file d1dt01002f1.pdf]

## Supporting Information

### **An unprecedented pyridine-based dinuclear mixed-valent $\text{Re}^{\text{I/VII}}$ oxo-bridged complex: Solvatochromic and AIE-active probe for nanomolar detection of picric acid and trinitrotoluene**

Atasi Mukherjee, Suman Bhattacharyya and Manab Chakravarty\*

#### **Details on the Studies:**

##### **Absorption and fluorescence studies**

Stock solutions of  $10^{-3}$  M **An-4Py** and **Re-4Py** were prepared in DMF. The absorption studies were performed by adding the sample (2 mL,  $10^{-5}$  M) to a quartz cuvette (1 cm  $\times$  1 cm). Emission spectra were simultaneously recorded with the same sample used for absorption. The excitation wavelength was 405 nm with an excitation slit/emission slit of 5.0 and PMT voltage of 400 eV.

##### **Aggregation-induced emission enhancement [AIE(E)] studies**

AIE(E) studies were performed using a mixture of DMF and water. The concentration of the probe ( $10^{-5}$  M) was kept constant throughout the experiment by varying the ratio of DMF and water (v/v%). All sensing studies were carried out with this aggregate.

##### **NAC quenching studies**

The handling of explosives such as PA and TNT was done carefully with proper protection and on the milligram scale at room temperature. PA was solubilized in distilled water and others nitroaromatics were solubilized in tetrahydrofuran (HPLC grade) to obtain  $10^{-2}$  M of stock solutions. At first, the absorption and emission spectra were recorded with the aggregate ( $f_w = 90\%$ ; with highest fluorescence intensity) followed by the addition of different NACs having a concentration of  $10^{-4}$  M.

##### **Time-resolved decay measurement**

The solution state lifetime was measured with the aggregated **Re-4Py** (2 mL,  $10^{-5}$  M) via pulse excitation of 405 nm and emission at 560 nm followed by the addition of 1  $\mu\text{L}$ , 3  $\mu\text{L}$  (+2  $\mu\text{L}$ ), 5  $\mu\text{L}$  (+2  $\mu\text{L}$ ) and 20  $\mu\text{L}$  of PA and TNT solution to the aggregated probe. The decay curves for **Re-4Py** and after the addition of PA and TNT were best-fitted via tri-exponential manner.

### **Detection limit calculation**

A series of titrations were carried out for the detection of PA and TNT using **Re-4Py**. A graph is plotted taking the log of quencher concentration on the X-axis and the ratio of fluorescence intensities after addition of quencher and maximum fluorescence intensity quenched on the Y-axis. The antilog of the X intercept is considered to be the detection limit.

### **Calculation of the Stern–Volmer constant**

The Stern–Volmer constant was calculated using the equation:  $I_0/I = 1 + K_{SV}[Q]$ , where  $I_0$  is the emission intensity in the absence of quencher,  $I$  is the emission intensity in the presence of quencher,  $K_{SV}$  is the quenching constant and  $[Q]$  is the concentration of the quencher. The  $K_{SV}$  value was derived from the slope of  $I_0/I$  vs.  $[Q]$  plots.

### **Cyclic voltammetry (CV) study**

CV measurement was carried out using Ag/AgCl and Pt wire as the reference electrode and counter electrode, respectively. **Re-4Py** coated film on ITO was used as a working electrode in a typical three electrode system. Tetrabutylammonium hexafluorophosphate (0.1 M) in acetonitrile was used as the electrolyte. The spectrum was recorded at room temperature under an inert atmosphere ( $N_2$  gas).

### **Paper strip quenching study**

The aggregate solution of **Re-4Py** (10  $\mu$ L,  $10^{-4}$  M) was drop-casted into Whatman filter paper (2 cm  $\times$  2 cm) and allowed to dry at 25  $^{\circ}$ C. The picture was captured after it dried completely. Then different concentrations of PA and TNT (5  $\mu$ L) solution were dropped on the fluorescent probe and the image was taken after 1 min. However, the quenching was occurred immediately.

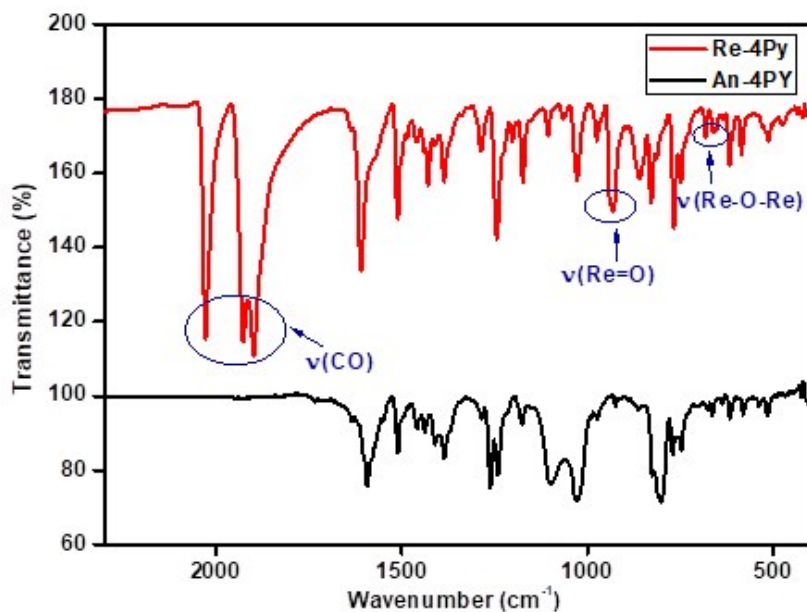

**Figure S1.** IR spectra of An-4PY and Re-4Py.

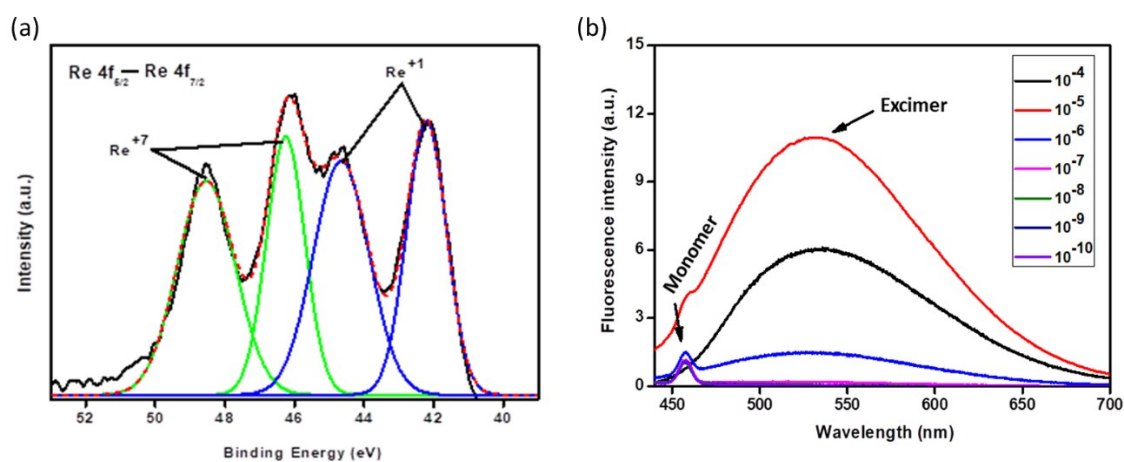

**Figure S2.** (a) XPS spectra of Re 4f region of Re-4Py. (b) Concentration-dependent emission spectra of Re-4Py in DMF.

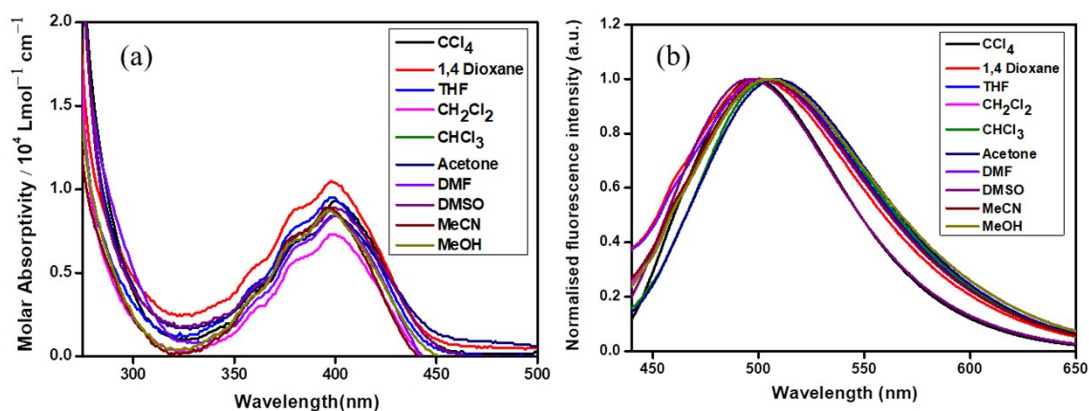

**Figure S3.** (a) Absorption and (b) emission spectra of **An-4Py** ( $10^{-5}$  M) in different solvents.  $\lambda_{\text{ex}} = 405$  nm.

**Table S1.** Absorption and emission maxima, relative quantum yields ( $\Phi_f$  in %) of **An-4Py** in different solvents. The error:  $\pm 3\%$ .

| Solvents                        | Abs $\lambda_{\text{max}}$ (nm) | Emi $\lambda_{\text{max}}$ (nm) | $\Phi_f$ (%) |
|---------------------------------|---------------------------------|---------------------------------|--------------|
| CCl <sub>4</sub>                | 400                             | 499                             | 7.78         |
| 1,4-Dioxane                     | 400                             | 501                             | 7.29         |
| THF                             | 399                             | 504                             | 6.67         |
| CH <sub>2</sub> Cl <sub>2</sub> | 400                             | 504                             | 1.96         |
| CHCl <sub>3</sub>               | 399                             | 506                             | 3.58         |
| Acetone                         | 399                             | 507                             | 2.67         |
| DMF                             | 400                             | 502                             | 3.51         |
| DMSO                            | 400                             | 506                             | 2.59         |
| MeCN                            | 395                             | 504                             | 1.25         |
| MeOH                            | 397                             | 504                             | 0.80         |

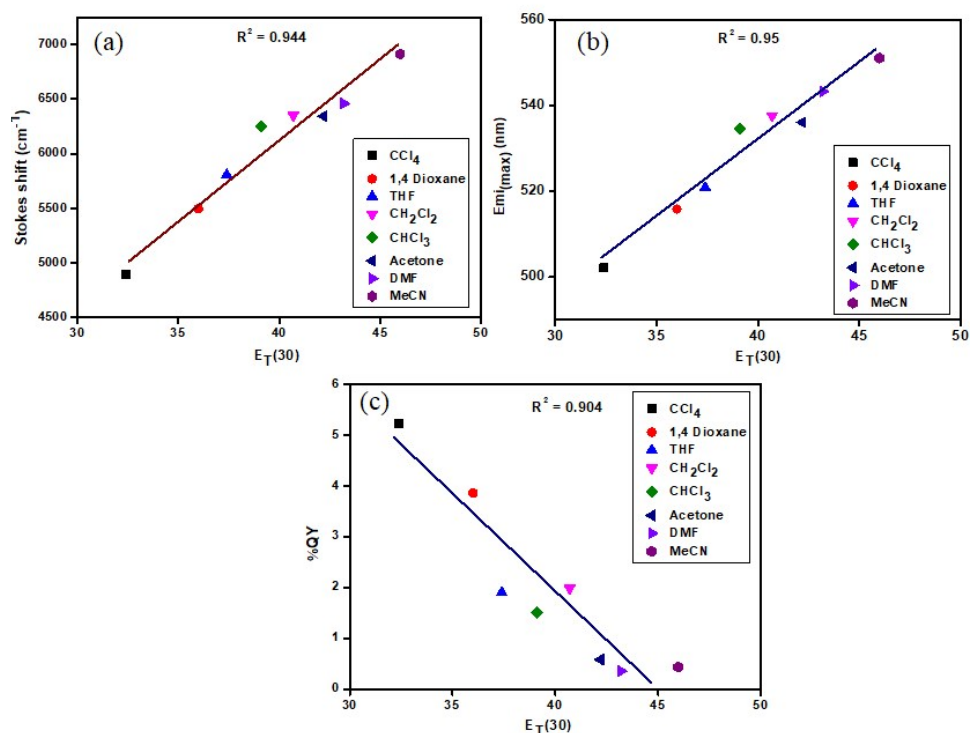

**Figure S4.** The plot of  $E_T(30)$  vs. (a) Stokes shift, (b) Emission max ( $\lambda_{max}$ ) and (c) quantum yield for **Re-4Py**. The error bar is  $\pm 3\%$ . The point for the solvent MeOH is neglected as it deviates significantly, possibly due to specific intermolecular interactions.

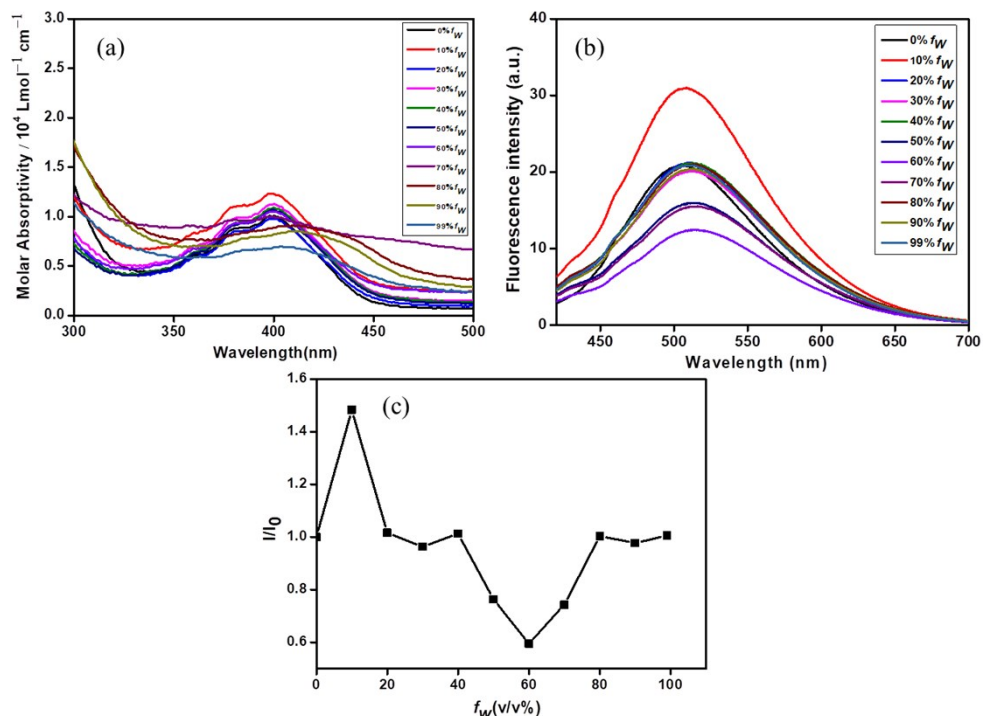

**Figure S5.** (a) Absorption and (b) emission spectra of **An-4Py** ( $10^{-5}$  M) with different  $f_w$  in DMF. (c)  $I/I_0$  vs.  $f_w$  (v/v%). ( $I_0$ : initial intensity and  $I$ : intensity after the addition of water)  $\lambda_{ex} = 405$  nm.

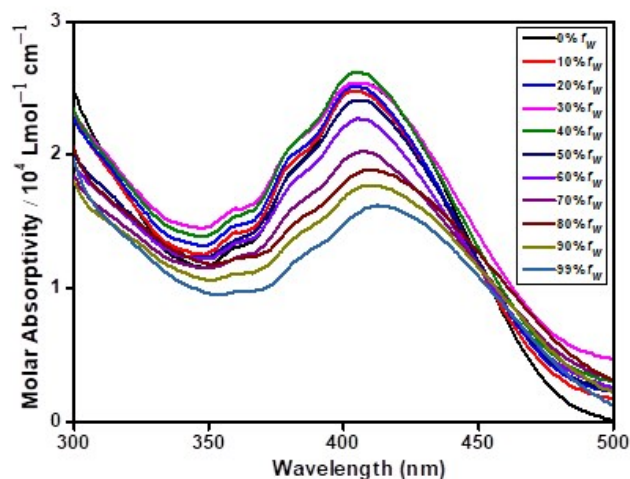

**Figure S6.** Absorption spectra of **Re-4Py** ( $10^{-5}$  M) with different  $f_w$  in DMF.

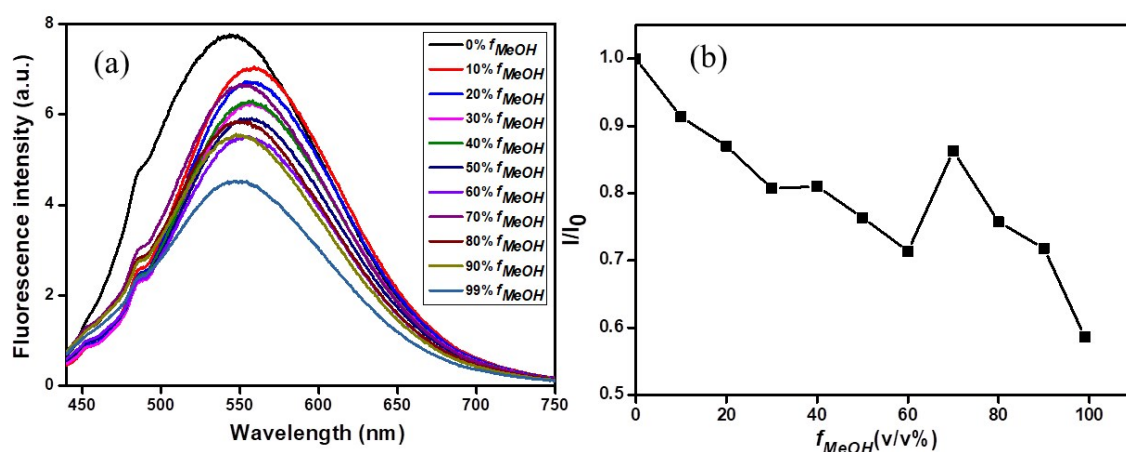

**Figure S7.** (a) Emission spectra of **Re-4Py** ( $10^{-5}$  M) with different  $f_{MeOH}$  in DMF (b)  $I/I_0$  vs  $f_{MeOH}$  (v/v %) ( $I_0$ : initial intensity and  $I$ : Intensity after addition of methanol)  $\lambda_{ex} = 405$  nm.

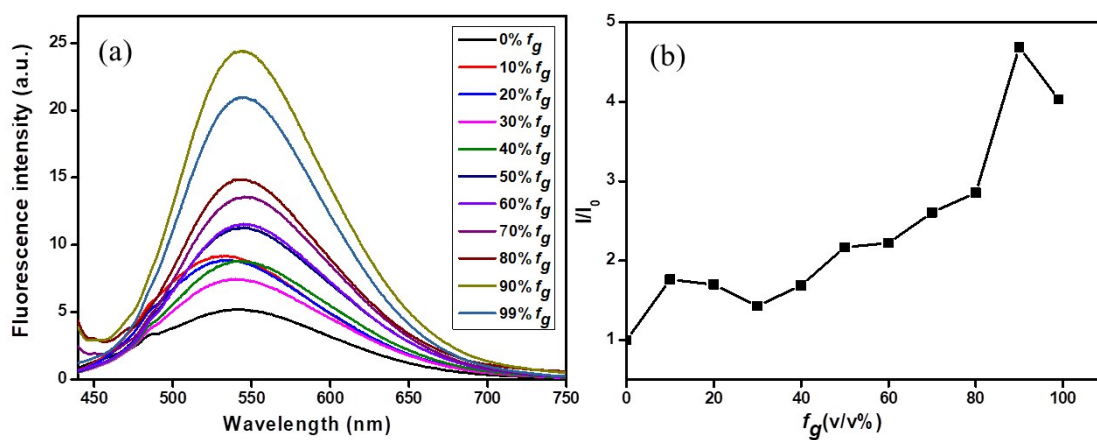

**Figure S8.** (a) Emission spectra of **Re-4Py** ( $10^{-5}$  M) with different  $f_g$  in methanol (b)  $I/I_0$  vs  $f_g$  (v/v %) ( $I_0$ : initial intensity and  $I$ : Intensity after addition of glycerol.)  $\lambda_{ex} = 405$  nm.

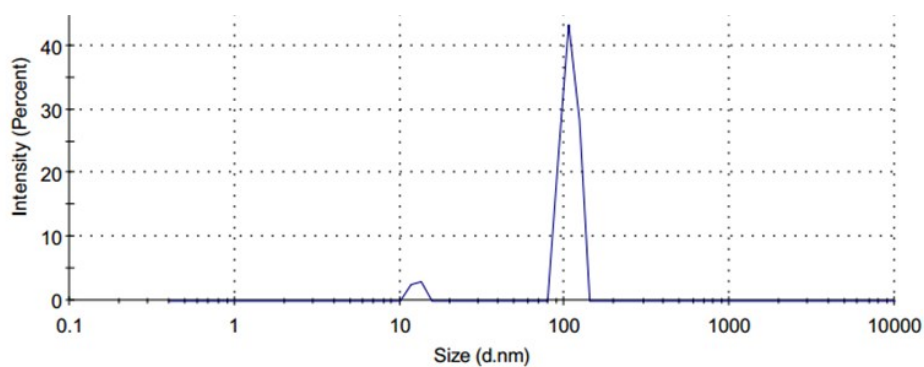

**Figure S9.** DLS plot of **Re-4Py** to find the average particle size.

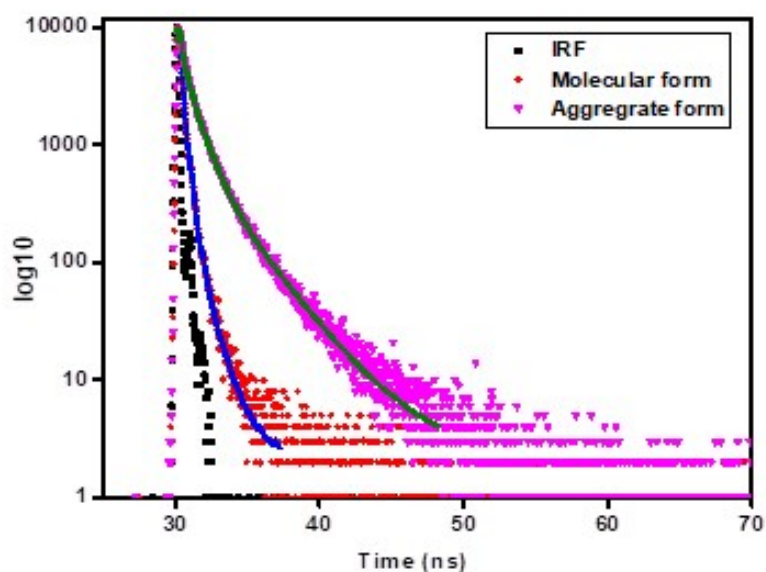

**Figure S10.** Lifetime decay plots of molecular and aggregate states of **Re-4Py**.

**Table S2.**  $k_r$  and  $k_{nr}$  values for **Re-4Py** in molecular and in aggregate states.  $k_r = \Phi_f / \tau$ ,  $k_r = (1 - \Phi_f) / \tau$ ,

| Form      | $\Phi_f$ (%) | $\langle \tau \rangle$ (ns) | $k_r$ ( $s^{-1}$ ) | $k_{nr}$ ( $s^{-1}$ ) | $k_r / k_{nr}$         |
|-----------|--------------|-----------------------------|--------------------|-----------------------|------------------------|
| Molecular | 0.35         | 0.92                        | $3.80 \times 10^6$ | $1.08 \times 10^9$    | $3.52 \times 10^{-3}$  |
| Aggregate | 1.21         | 1.23                        | $9.83 \times 10^6$ | $0.80 \times 10^9$    | $12.29 \times 10^{-3}$ |

**Table S3.** Life time data for **Re-4Py** in molecular and in aggregate states.

| Form      | $\alpha_1(\%)$ | $\alpha_2(\%)$ | $\alpha_3(\%)$ | $\tau_1(\text{ns})$ | $\tau_2(\text{ns})$ | $\tau_3(\text{ns})$ | $\langle\tau\rangle(\text{ns})$ | $\chi^2$ |
|-----------|----------------|----------------|----------------|---------------------|---------------------|---------------------|---------------------------------|----------|
| Molecular | 29.00          | 63.79          | 7.20           | 0.07                | 0.25                | 1.03                | 0.92                            | 1.07     |
| Aggregate | 28.21          | 47.49          | 24.30          | 0.27                | 0.97                | 2.83                | 1.23                            | 1.02     |

**Table S4.** Intermolecular Interactions in the ligand, **An-4Py** and complex **Re-4Py** (considering sum of van der Waals radii only)

| Type of interactions | Distances (Å) for ligand (12)             | Distances (Å) for complex (28)                                |
|----------------------|-------------------------------------------|---------------------------------------------------------------|
| C...H                | 2.867, 2.671, 2.761, 2.799, 2.824, 2.855, | 2.897, 2.772, 2.870, 2.891, 2.799, 2.702, 2.442, 2.799, 2.888 |
| H...H                | 2.286, 2.357, 2.371                       | 1.901, 2.075, 2.130, 2.347, 2.252, 2.271                      |
| O...H                | 2.630                                     | 2.412, 2.603, 2.459, 2.619, 2.573, 2.702, 2.650, 2.708        |
| C...C                | 3.374                                     | 2.985 (not $\pi\dots\pi$ )                                    |
| N...H                | 2.721                                     |                                                               |
| C...O                |                                           | 3.096, 3.173, 3.119, 3.102                                    |

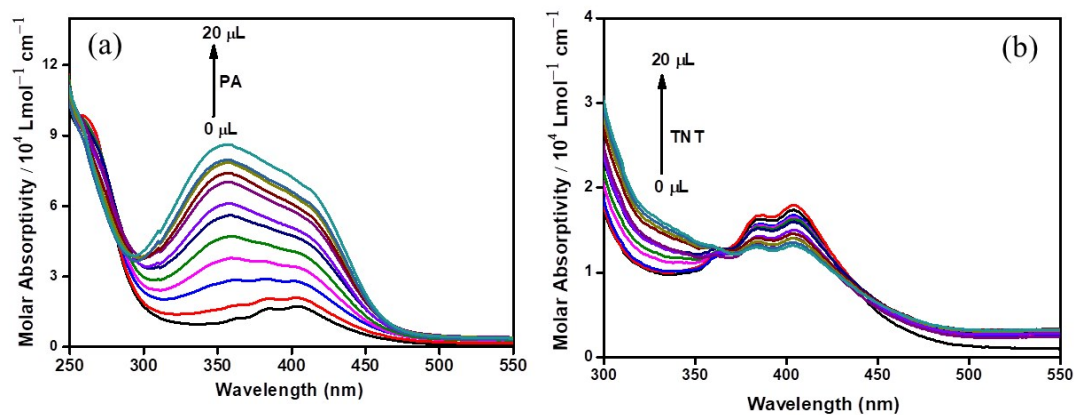**Figure S11.** (a) Absorption spectra of aggregated **Re-4Py** upon the gradual addition of different volumes of (a) PA and (b) TNT solution ( $10^{-4}$  M).



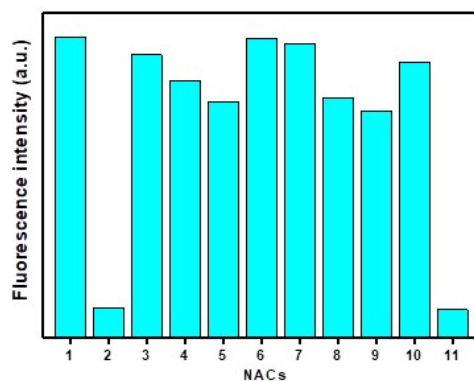

**Figure S12.** The bar diagram shows the quenching of PA in the presence of all other NACs (tested herein). The error:  $\pm 3\%$ .  $\lambda_{\text{ex}} = 405 \text{ nm}$ . 1. Aggr.; 2. PA; 3. 2-NP; 4. 3-NAcP; 5. 3-NBAc; 6. 4-NBA; 7. Br-NB; 8. 4-NP; 9. NB; 10. 2-NAN; 11. PA + others.

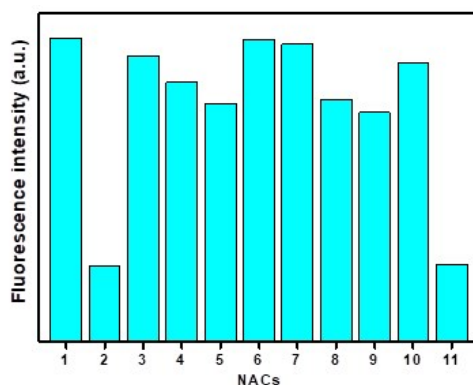

**Figure S13.** The bar diagram shows the quenching of TNT in the presence of all other NACs (tested herein). The error:  $\pm 3\%$ .  $\lambda_{\text{ex}} = 405 \text{ nm}$ . 1. Aggr.; 2. TNT; 3. 2-NP; 4. 3-NAcP; 5. 3-NBAc; 6. 4-NBA; 7. Br-NB; 8. 4-NP; 9. NB; 10. 2-NAN; 11. TNT + others.

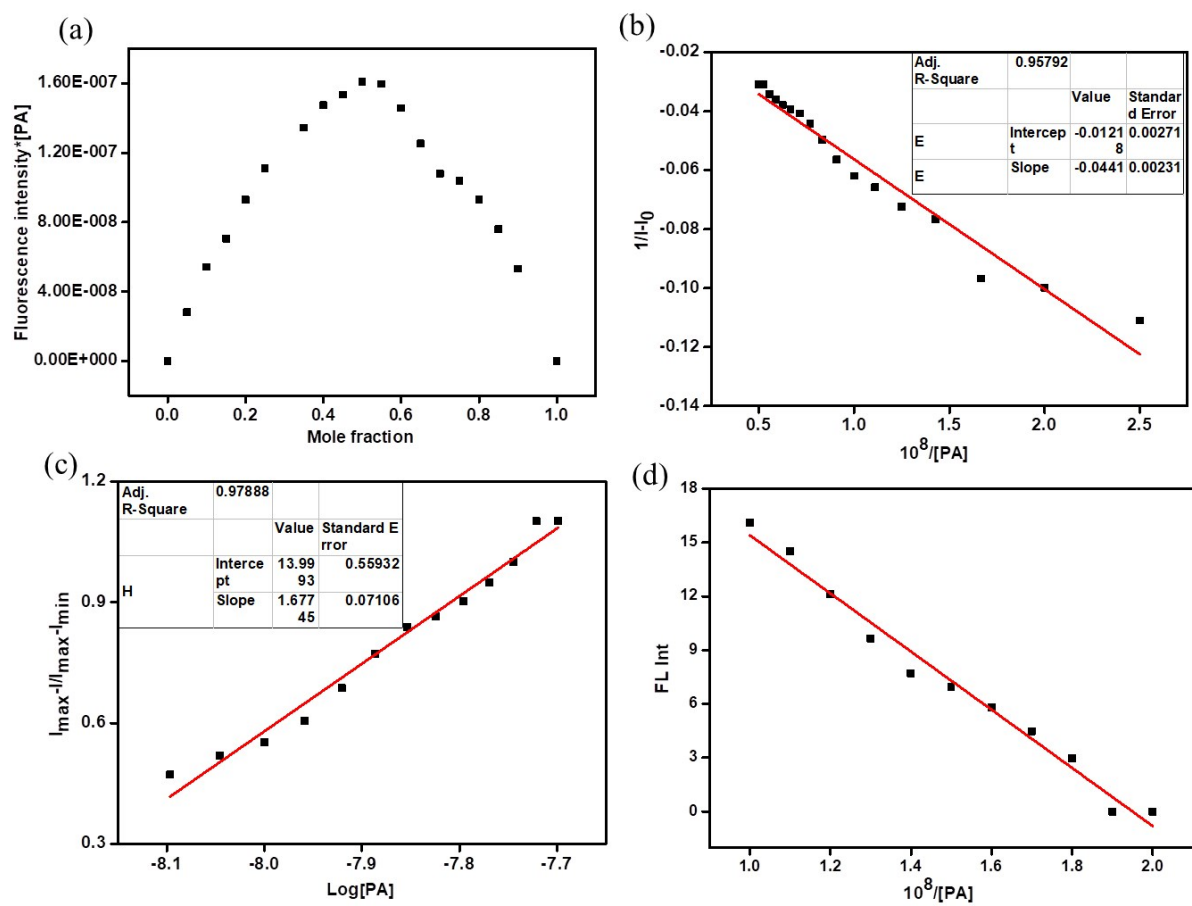

**Figure S14.** (a) Job's plot, (b) binding constant, (c) detection limit (method 1) and (d) detection limit (method 2) of aggregated **Re-4Py** for PA.

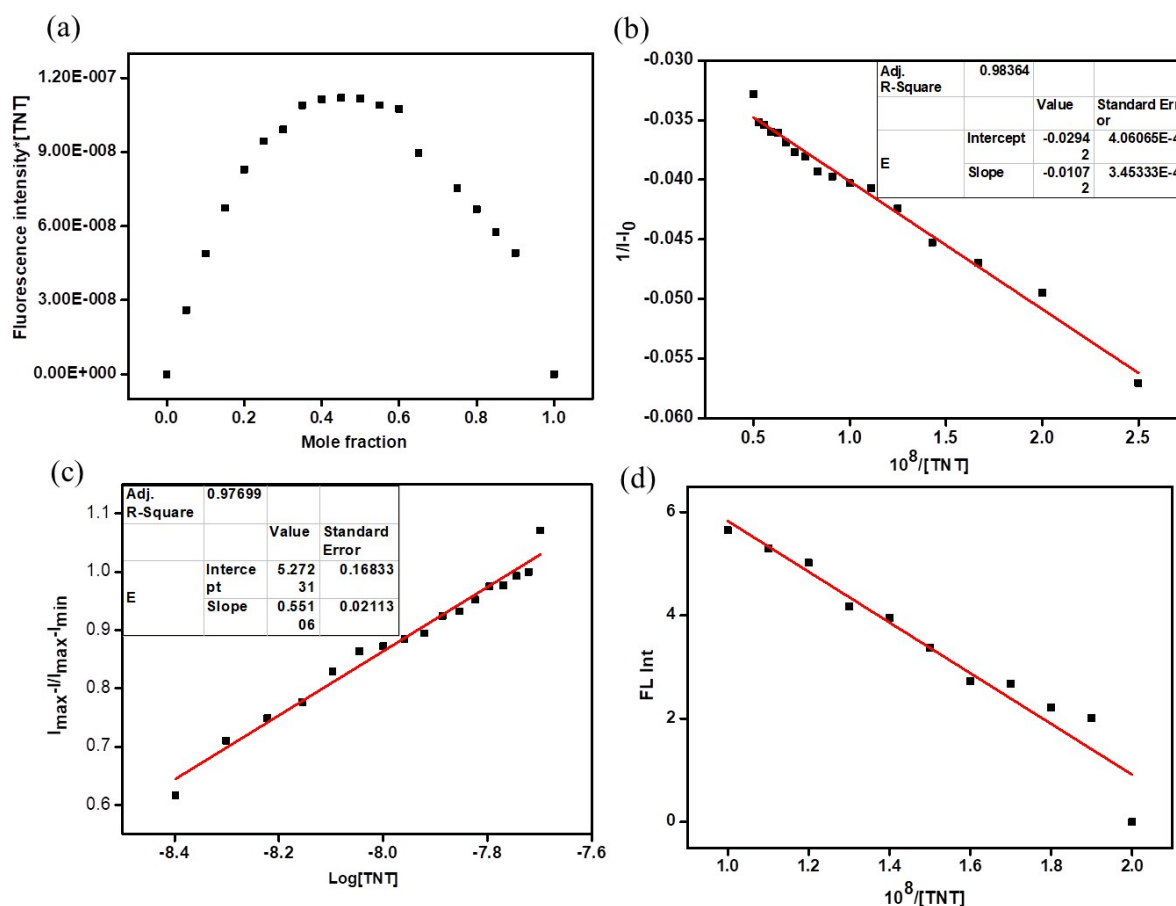

**Figure S15** (a) Job's plot, (b) binding constant, (c) detection limit (method 1) and (d) detection limit (method 2) of aggregated **Re-4Py** for TNT.

**Table S5.** Comparison between previously reported probes to that of present work in terms of detection limit values for PA.

|    | S. No. | Description of probe                                                                     | Detection limit in solution                       | Reference no. in the manuscript |
|----|--------|------------------------------------------------------------------------------------------|---------------------------------------------------|---------------------------------|
| PA | 1      | AIEE-active tripodal pyrazole compounds based on a 1,3,5-triethylbenzene scaffold        | 450 and 434 ppb                                   | 2(c)                            |
|    | 2      | AIEE-active Alkoxy-Bridged Binuclear Rhenium(I) Complexes                                | -----                                             | 5(a)                            |
|    | 3      | AIE-active Triphenylethylene-based biimidazole ligands and Re(I) complexes               | $8.2 \times 10^{-6}$ and $10.1 \times 10^{-6}$ M, | 13                              |
|    | 4      | AIE-active hyperbranched polytriazole compounds                                          | -----                                             | 17(a)                           |
|    | 6      | AIEE-active pyreneamide-based compounds                                                  | 0.13 pM                                           | 17(f)                           |
|    | 7      | AIE-active pyridine-based dinuclear mixed-valent $\text{Re}^{I/VII}$ oxo-bridged complex | $7.76 \times 10^{-9}$ M                           | Present work                    |

**Table S6.** Comparison between previously reported probes to that of present work in terms of detection limit values for TNT.

|     | S. No. | Description of probe                                                                                                               | Detection limit in solution                                     | Reference no. in the manuscript |
|-----|--------|------------------------------------------------------------------------------------------------------------------------------------|-----------------------------------------------------------------|---------------------------------|
| TNT | 1      | AIPE-active iridium(III) bis(2-(2,4-difluorophenyl)pyridinato- <i>N,C2'</i> ) (2-(2-pyridyl)benzimidazolato- <i>N,N'</i> ) complex | 9.08 mg mL <sup>-1</sup>                                        | 17(c)                           |
|     | 2      | AIE active hyperbranched polytriazole compounds                                                                                    | -----                                                           | 17(a)                           |
|     | 3      | AIEE-Active heterooligophenylene-based carbazole compounds                                                                         | 30x10 <sup>-9</sup> and 40x10 <sup>-9</sup> mol L <sup>-1</sup> | 17(b)                           |
|     | 4      | AIE-active anthracene-based electron-rich $\pi$ -conjugate                                                                         | 3.2x10 <sup>-9</sup> M                                          | 18(d)                           |
|     | 5      | AIE active pyridine-based dinuclear mixed-valent Re <sup>I/VII</sup> oxo-bridged complex                                           | 2.69x10 <sup>-9</sup> M                                         | Present work                    |

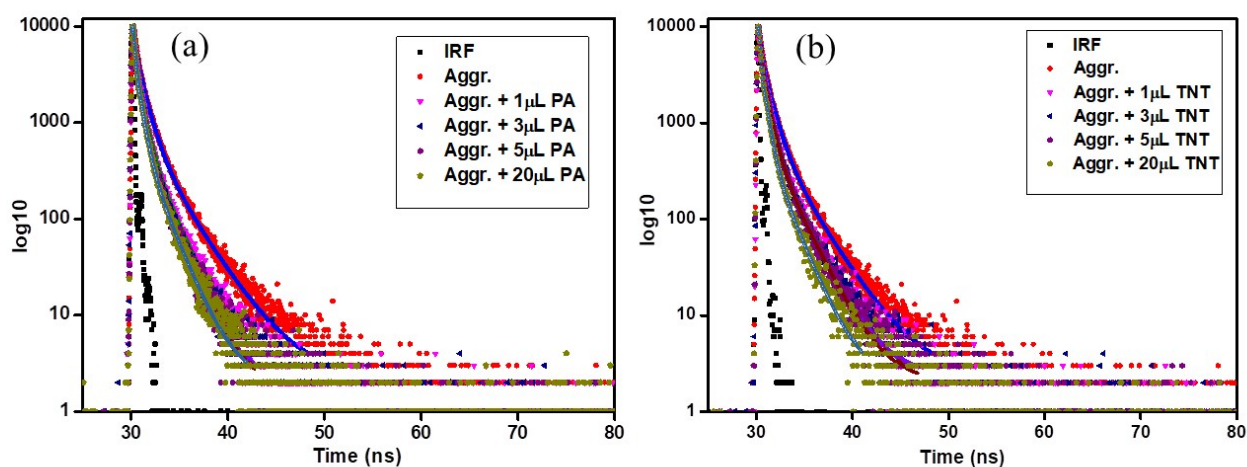

**Figure S16.** Lifetime decay plots of aggregated Re-4Py and after adding (a) PA and (b) TNT.

**Table S7.** Lifetime data for aggregated **Re-4Py** and after adding PA and TNT.

| <b>NACs</b> | <b>Solution added<br/>(<math>\mu\text{L}</math>)</b> | $\alpha_1(\%)$ | $\alpha_2(\%)$ | $\alpha_3(\%)$ | $\tau_1$<br>(ns) | $\tau_2$<br>(ns) | $\tau_3$<br>(ns) | $\langle\tau\rangle$<br>(ns) | $\chi^2$ |
|-------------|------------------------------------------------------|----------------|----------------|----------------|------------------|------------------|------------------|------------------------------|----------|
|             | Only aggregate of<br><b>Re-4Py</b>                   | 25.00          | 47.34          | 27.66          | 0.24             | 0.88             | 2.58             | 1.20                         | 1.05     |
| PA          | 1                                                    | 33.52          | 42.36          | 24.12          | 0.18             | 0.63             | 1.94             | 0.79                         | 1.02     |
|             | 3                                                    | 33.73          | 42.33          | 23.94          | 0.15             | 0.54             | 1.79             | 0.71                         | 1.06     |
|             | 5                                                    | 36.77          | 42.34          | 20.89          | 0.15             | 0.59             | 1.88             | 0.70                         | 1.08     |
|             | 20                                                   | 36.94          | 44.34          | 18.72          | 0.12             | 0.52             | 1.83             | 0.62                         | 1.30     |
| TNT         | 1                                                    | 31.24          | 44.87          | 23.90          | 0.17             | 0.67             | 2.24             | 0.89                         | 1.10     |
|             | 3                                                    | 33.88          | 44.56          | 21.56          | 0.17             | 0.69             | 2.24             | 0.85                         | 1.01     |
|             | 5                                                    | 35.92          | 42.95          | 21.13          | 0.18             | 0.72             | 2.21             | 0.84                         | 1.20     |
|             | 20                                                   | 34.84          | 44.07          | 21.09          | 0.14             | 0.54             | 1.77             | 0.66                         | 1.13     |

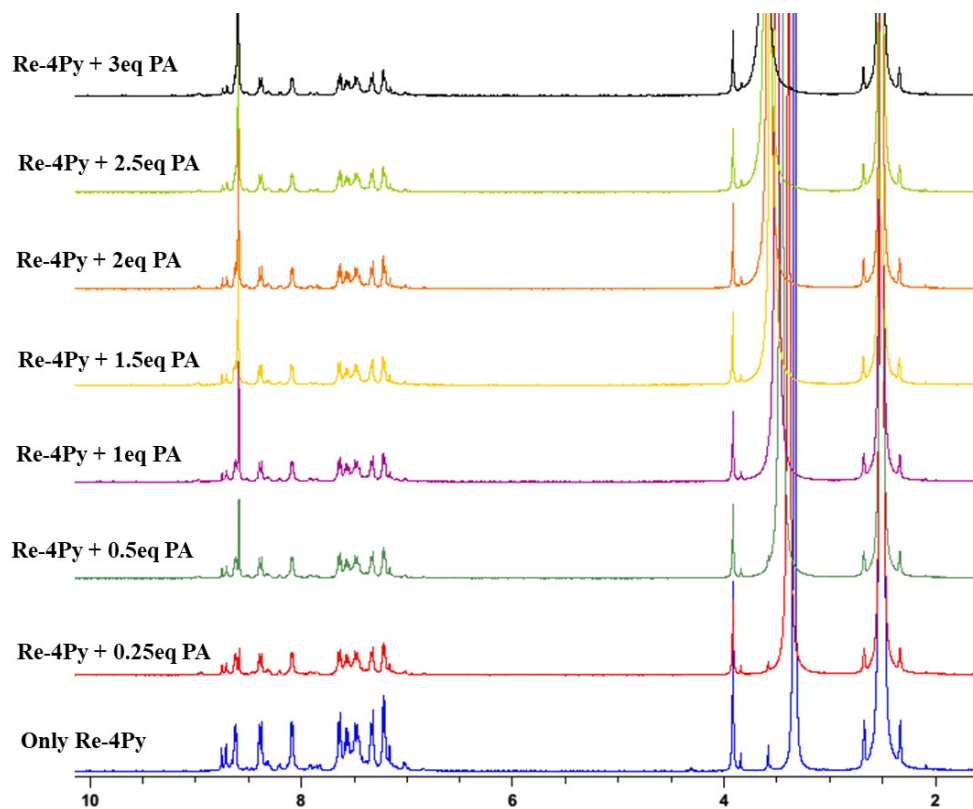

**Figure S17.**  $^1\text{H}$  NMR spectra obtained for the titration of **Re-4PY** with PA in  $\text{DMSO-d}_6$ .

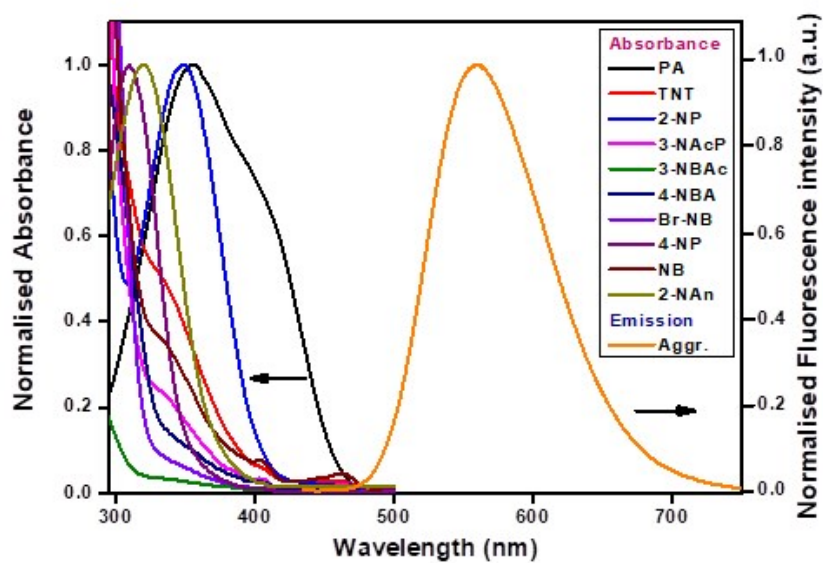

**Figure S18.** Absorption spectra of NACs (left) and emission spectrum of aggregated **Re-4Py** (right).

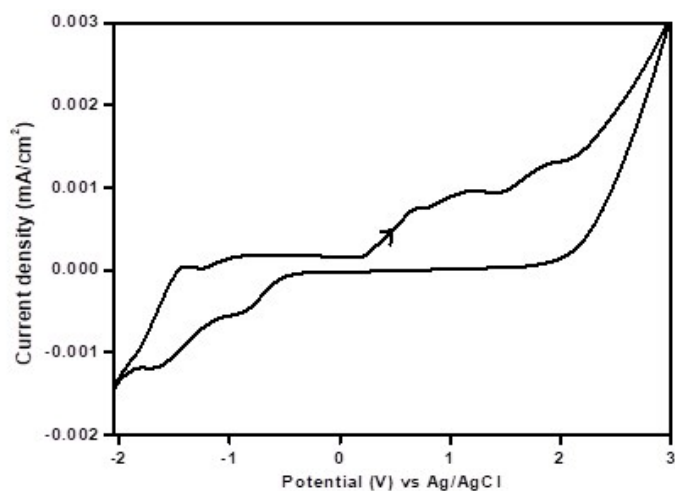

**Figure S19.** The cyclic voltammograms of **Re-4Py** (coated film on ITO) under inert atmosphere (N<sub>2</sub> gas) using Ag/AgCl as reference electrode.  $E_{\text{LUMO}} = -(E_{\text{onset}}^{\text{red}} + 4.8 - 0.49) \text{ eV}$ . [ $E_{\text{onset}}^{\text{red}} = -0.64 \text{ vs Ag/AgCl}$ ;  $E_{\text{LUMO}} = -3.67 \text{ eV}$ ]

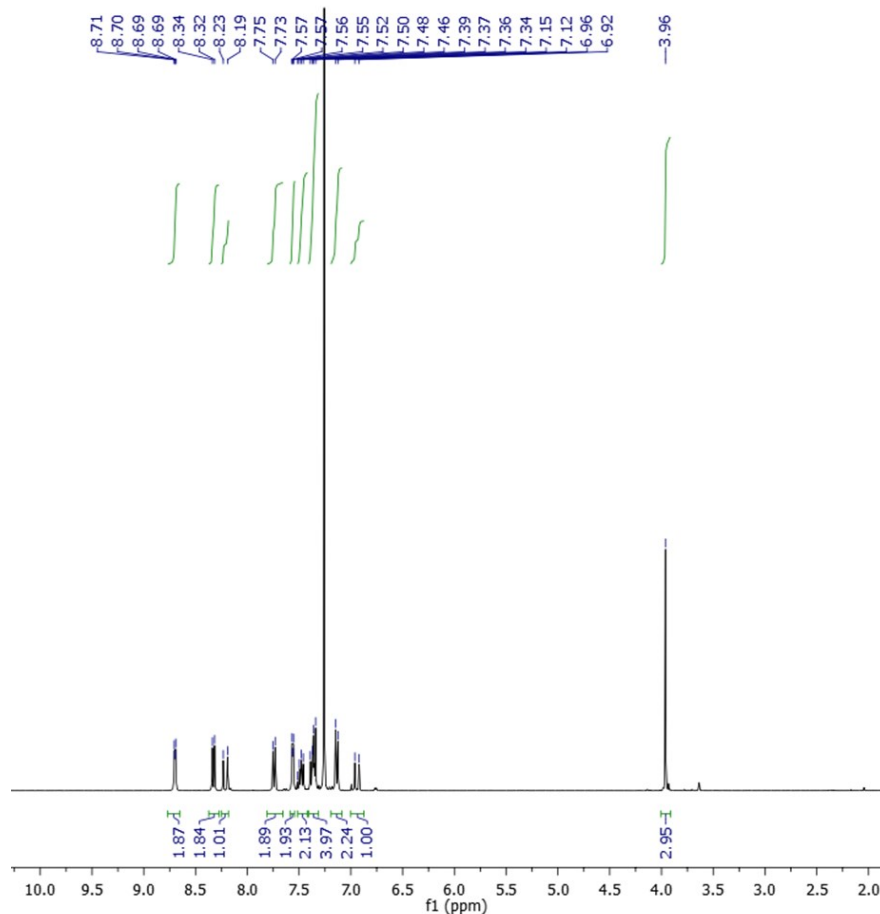

**Figure S20.** Partial <sup>1</sup>H NMR spectra of **An-4Py**.

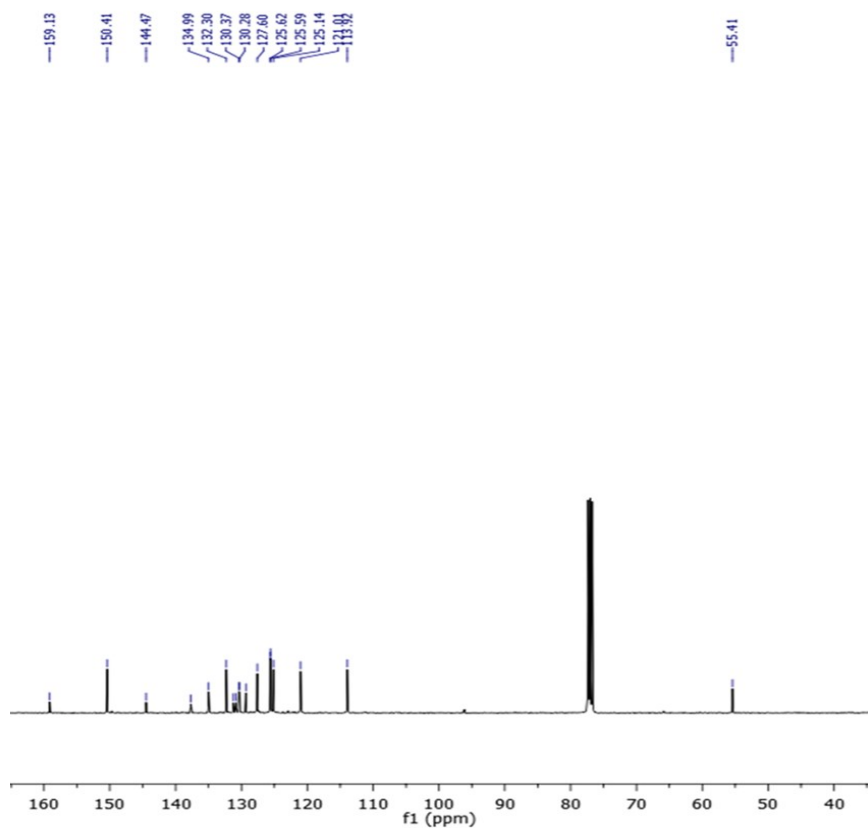

Figure S21. Partial  $^{13}\text{C}$  NMR spectra of An-4Py.

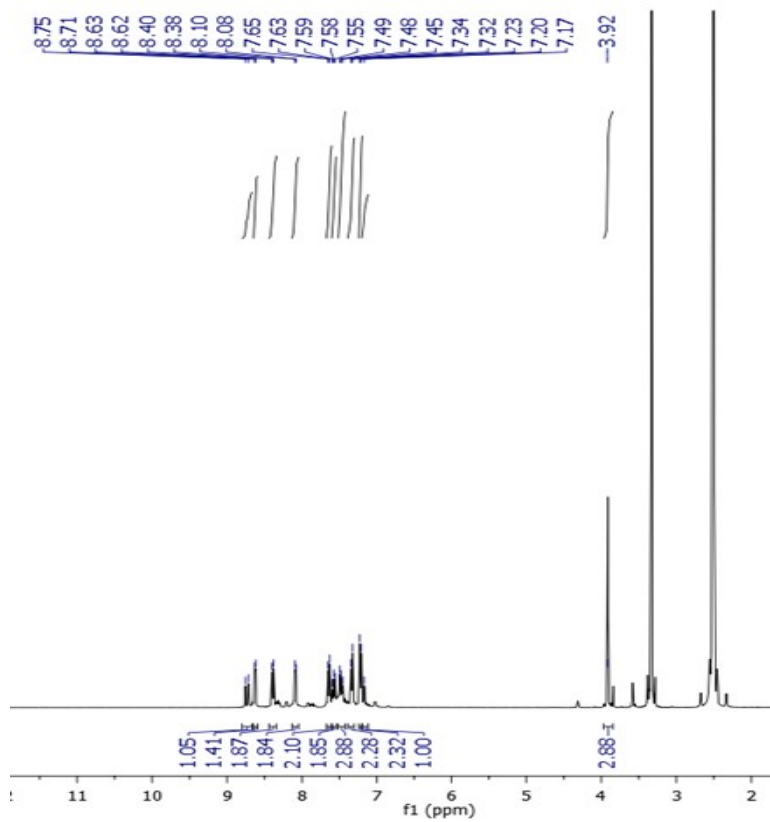

Figure S22. Partial  $^1\text{H}$  NMR spectra of Re-4Py.



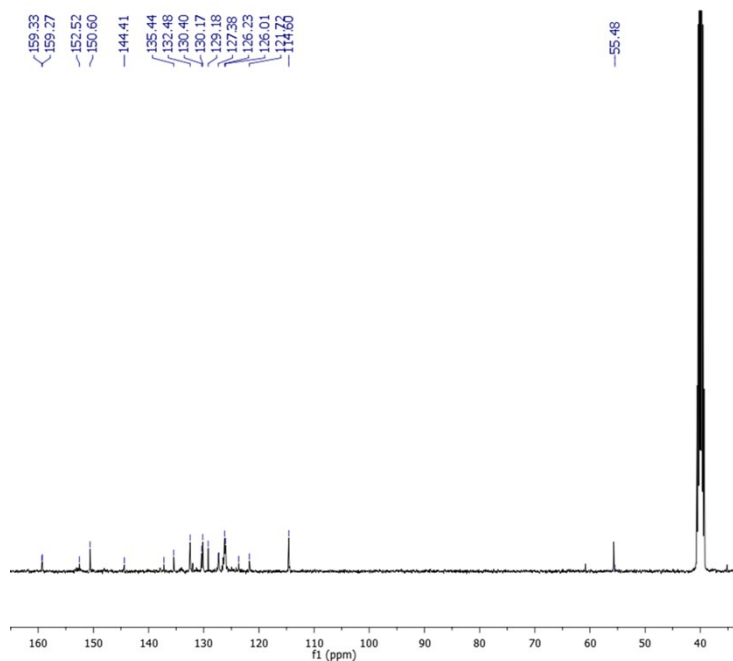

Figure S23. Partial  $^{13}\text{C}$  NMR spectra of Re-4Py.

Compound Table

| Compound Label       | RT    | Mass      | Abund | Formula                                                                       | Tgt Mass  | Diff (ppm) |
|----------------------|-------|-----------|-------|-------------------------------------------------------------------------------|-----------|------------|
| Cpd 1: 1.417 60.0441 | 1.417 | 1292.1875 | 163   | C <sub>59</sub> H <sub>42</sub> N <sub>2</sub> O <sub>9</sub> Re <sub>2</sub> | 1292.1949 | -5.75      |

| Compound Label       | m/z       | RT    | Algorithm       | Mass      |
|----------------------|-----------|-------|-----------------|-----------|
| Cpd 1: 1.417 60.0441 | 1318.1788 | 1.417 | Find By Formula | 1292.1875 |

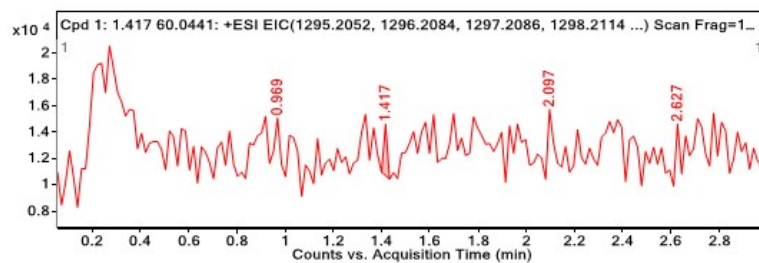

MS Zoomed Spectrum

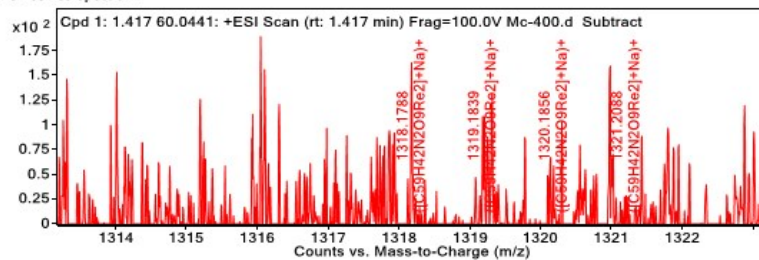

MS Spectrum Peak List

| m/z       | Calc m/z  | Diff(ppm) | z | Abund  | Formula                                                                       | Ion                 |
|-----------|-----------|-----------|---|--------|-------------------------------------------------------------------------------|---------------------|
| 1318.1788 | 1318.1904 | 8.74      | 1 | 163.01 | C <sub>59</sub> H <sub>42</sub> N <sub>2</sub> O <sub>9</sub> Re <sub>2</sub> | (M+Na) <sup>+</sup> |
| 1319.1839 | 1319.1906 | 5.03      | 1 | 109.58 | C <sub>59</sub> H <sub>42</sub> N <sub>2</sub> O <sub>9</sub> Re <sub>2</sub> | (M+Na) <sup>+</sup> |
| 1320.1856 | 1320.1934 | 5.87      | 1 | 61.44  | C <sub>59</sub> H <sub>42</sub> N <sub>2</sub> O <sub>9</sub> Re <sub>2</sub> | (M+Na) <sup>+</sup> |
| 1321.2088 | 1321.1964 | -9.4      | 1 | 30.11  | C <sub>59</sub> H <sub>42</sub> N <sub>2</sub> O <sub>9</sub> Re <sub>2</sub> | (M+Na) <sup>+</sup> |

Figure S24. HRMS spectra of Re-4Py.

END
